# Supplementary material for: Factors associated with breast cancer awareness and breast self-examination in Fiji and Kashmir India – a cross-sectional study
Source: Springer Nature journal article supplement (doi:10.1186/s12885-020-07583-w), 2020-11-10
Supplement: MOESM2 [file 18573126]

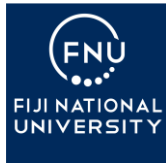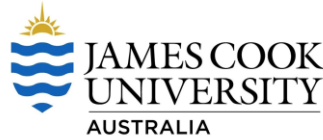

|                           |
|---------------------------|
| <b>ID:</b>                |
| <b>Date of Interview:</b> |
| <b>Division:</b>          |
| <b>Subdivision:</b>       |
| <b>Area:</b>              |
| <b>Interviewer:</b>       |

### **Breast Self-examination Questionnaire**

*The information you provide here will remain completely anonymous. Please provide the most appropriate answer for each of the following questions.*

|                                                               |                                              |                                       |
|---------------------------------------------------------------|----------------------------------------------|---------------------------------------|
| 1. Your age (in years):                                       |                                              |                                       |
| 2. Ethnicity                                                  |                                              |                                       |
| 3. Marital status<br>(Tick one):                              | • Single/ never married                      |                                       |
|                                                               | • Married                                    |                                       |
|                                                               | • Engaged                                    |                                       |
|                                                               | • Previously married/divorced/separated      |                                       |
|                                                               | • In a relationship but not married/Defector |                                       |
| 4. Education Level<br>(Tick highest level applicable to you): | • Nil                                        |                                       |
|                                                               | • Primary                                    | Up to 6 <sup>th</sup> grade (Class 6) |
|                                                               |                                              | Up to 8 <sup>th</sup> grade (Class 8) |
|                                                               | • Secondary                                  | Up to 10 <sup>th</sup> grade (Form 4) |
|                                                               |                                              | Up to 12 <sup>th</sup> grade (Form 6) |
|                                                               |                                              | Up to 13 <sup>th</sup> grade (Form 7) |
| • Tertiary                                                    |                                              |                                       |

| <b>Please tick yes or no for the following questions</b>                      |                                                                                                               |                      | <b>Yes</b> | <b>No</b> |
|-------------------------------------------------------------------------------|---------------------------------------------------------------------------------------------------------------|----------------------|------------|-----------|
| 5.                                                                            | Are you a smoker?                                                                                             |                      |            |           |
| 6.                                                                            | a) Have you heard about breast cancer?                                                                        |                      |            |           |
|                                                                               | b) Do you believe that breast cancer can be detected early?                                                   |                      |            |           |
|                                                                               | c) Do you believe that early detection increases the chance of survival?                                      |                      |            |           |
| 7.                                                                            | Are you aware of the signs and symptoms of breast cancer?                                                     |                      |            |           |
| 8.                                                                            | Are you worried about getting breast cancer?                                                                  |                      |            |           |
| 9.                                                                            | Have you previously had breast cancer?                                                                        |                      |            |           |
| 10.                                                                           | Any family history of breast cancer in your parents, siblings or children?                                    |                      |            |           |
| 11.                                                                           | a) Have you felt a breast lump/mass or noticed change in your breast before?                                  |                      |            |           |
|                                                                               | b) If yes, did you see your doctor about this?                                                                |                      |            |           |
| 12.                                                                           | a) If you feel a breast lump or notice changes in your breast in the future, would you go see your doctor?    |                      |            |           |
|                                                                               | b) Is your usual doctor whom you visit at nearest health facility a female or male?                           | Male                 |            |           |
|                                                                               |                                                                                                               | Female               |            |           |
|                                                                               | c) Would you prefer to see a female doctor for this issue?                                                    |                      |            |           |
| d) In general, do you feel shy and reluctant to discuss breast health issues? |                                                                                                               |                      |            |           |
| 13.                                                                           | Do you feel there is a lack of female doctors or healthcare nurses you can go to about breast issues locally? |                      |            |           |
| 14.                                                                           | Have you heard of breast self-examination?                                                                    |                      |            |           |
| 15.                                                                           | Have you been taught the technique of breast self-examination?                                                |                      |            |           |
| 16.                                                                           | a) Do you palpate your breasts on a regular basis?                                                            |                      |            |           |
|                                                                               | b) If Yes, how often?                                                                                         |                      |            |           |
| 17.                                                                           | When was the last time you visited your doctor?<br>(Tick one)                                                 | Within a month       |            |           |
|                                                                               |                                                                                                               | Within a year        |            |           |
|                                                                               |                                                                                                               | More than a year ago |            |           |
|                                                                               |                                                                                                               | Never                |            |           |
| 18.                                                                           | Why do you think women do not palpate their breast or do self-breast examination?                             |                      |            |           |

**Thank you for participating in this survey**
